# Supplementary material for: MacroH2A1 associates with nuclear lamina and maintains chromatin architecture in mouse liver cells
Source: PubMed Central journal article supplement (PMC4658601; doi:10.1038/srep17186), 2015-11-25
Supplement: srep17186-s1.pdf [file srep17186-s1.pdf]

## Supplementary Information

### **MacroH2A1 associates with nuclear lamina and maintains chromatin architecture in mouse liver cells**

Yuhua Fu<sup>1</sup>, Pin Lv<sup>1</sup>, Guoquan Yan<sup>1-2</sup>, Hui Fan<sup>1</sup>, Lu Cheng<sup>1</sup>, Feng Zhang<sup>3</sup>, Yongjun Dang<sup>1</sup>,  
Hao Wu<sup>4</sup> and Bo Wen<sup>1,3\*</sup>

<sup>1</sup> Key Laboratory of Molecular Medicine of Ministry of Education and Institutes of Biomedical Sciences, Shanghai Medical College, Fudan University, Shanghai 200032, China; <sup>2</sup> Department of Chemistry, Fudan University, Shanghai, 200433; <sup>3</sup> State Key Laboratory of Genetic Engineering and Collaborative Innovation Center for Genetics and Development, School of Life Sciences, Fudan University, Shanghai 200438, China; <sup>4</sup> Department of Biostatistics and Bioinformatics, Emory University, Atlanta, GA 30322, USA.

\* Author for correspondence ([bowen75@fudan.edu.cn](mailto:bowen75@fudan.edu.cn))

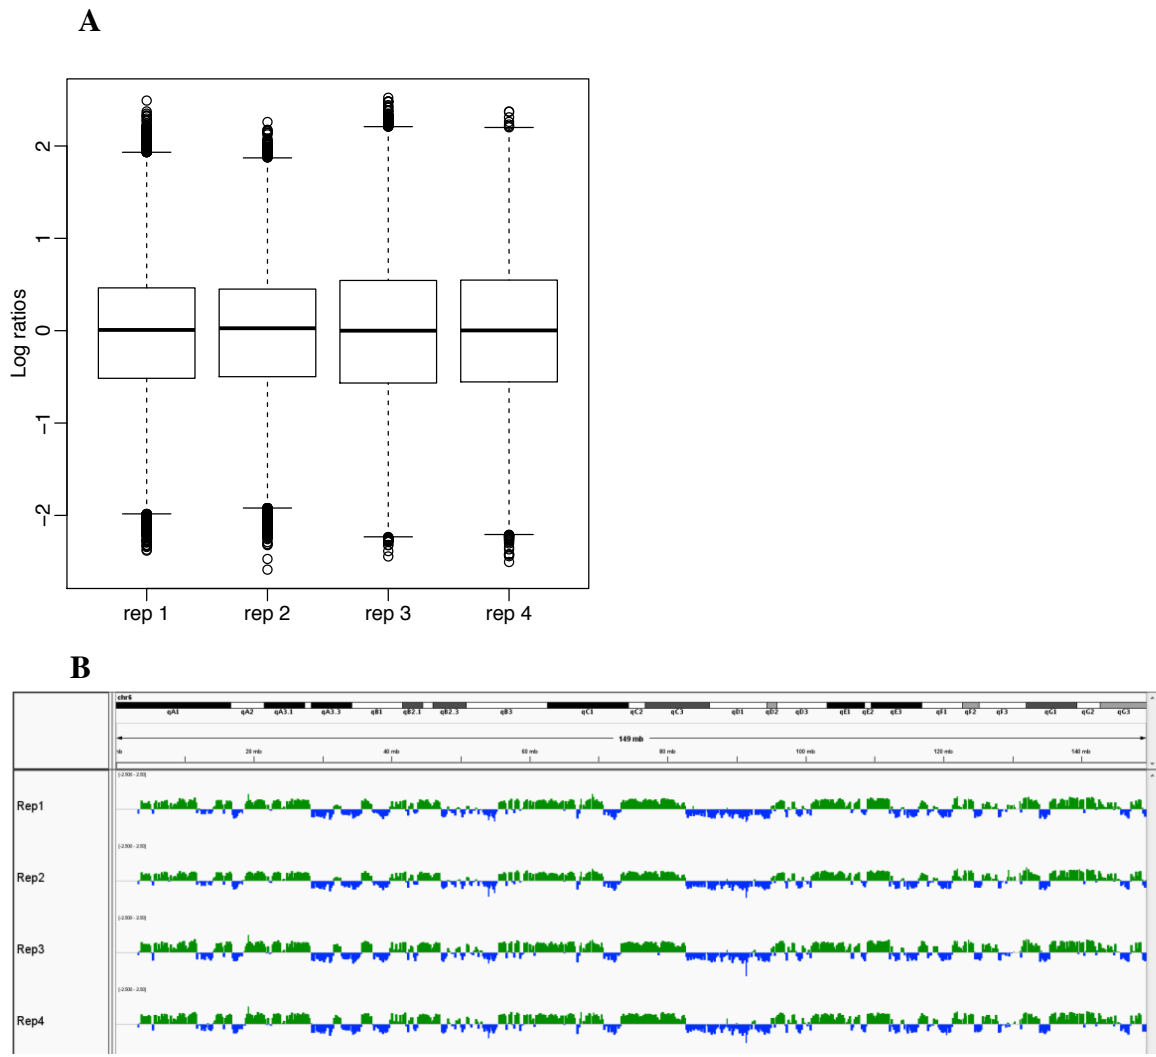

**Figure S1. Reproducibility of biological replicates of LMNB1 DamID in AML12 cells.** (A) Boxplot of LMNB1 signals ( $\log_2$  ratios of Dam-LMNB1/Dam-only) from replicates. Average correlation of data from the four replicates is 0.85. (B) LMNB1 signals across genome, as exemplified by chromosomes 6, show almost identical distributions among replicates. These results indicate a highly reproducibility of these experiments.

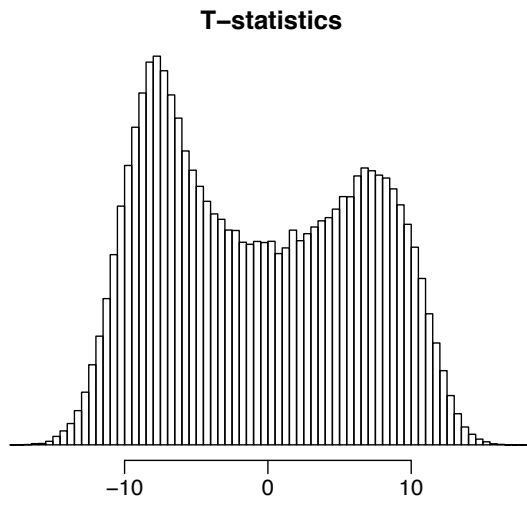

**Figure S2. Histogram of probe level t-statistics from smoothed signals.** Histogram of the resulting test statistics shows a clear bimodal distribution. Two parts of the distribution represent probes from Lamin B1 associated chromatin domains (LADs) and non-LADs.

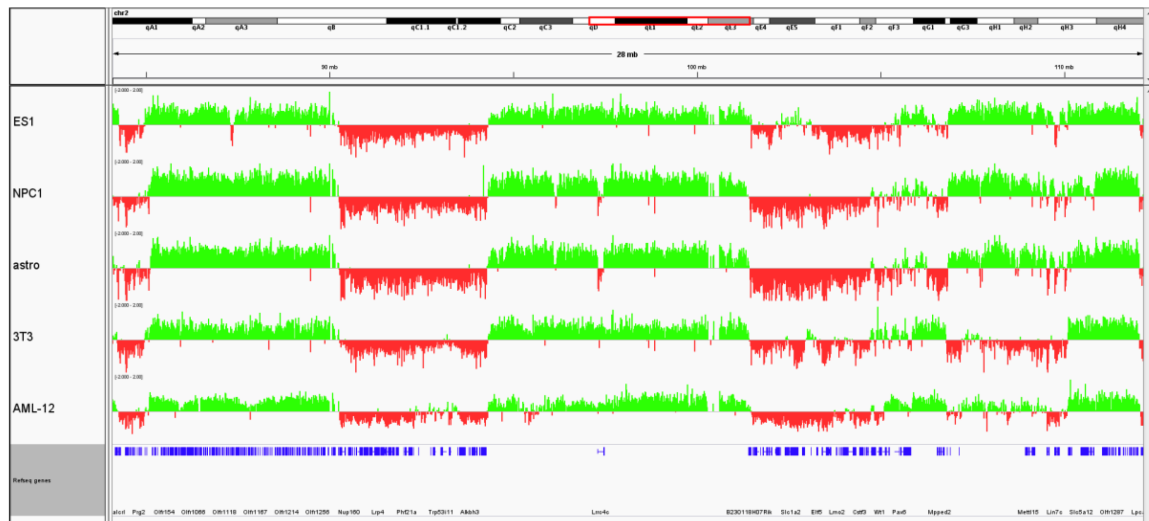

**Figure S3. Comparison of LMNB1-chromatin association maps among cell types.** Showing is LMNB1 signals of embryonic stem cells (ES), neural progenitor cells (NPC), Astrocytes (Astro), 3T3 cells and AML12 cells, on a 28 Mb region of chromosome 2.

**Table S1.** Proteins associated with Lamin B1 as identified by BioID

| Gene     | Protein ID | BirA*-Lmnb1 BioID |      |      |       | BirA* BioID  |      |      |      |
|----------|------------|-------------------|------|------|-------|--------------|------|------|------|
|          |            | # of matches      |      |      |       | # of matches |      |      |      |
|          |            | Rep1              | Rep2 | Rep3 | PSM   | Rep1         | Rep2 | Rep3 | PSM  |
| Actn1    | Q7TPR4     | 388               | 372  | 386  | 278.1 | 10           | 12   | 35   | 49.1 |
| Actn2    | Q9JI91     | 0                 | 113  | 125  | 56.9  | 0            | 0    | 0    | 0    |
| Actn4    | P57780     | 387               | 380  | 383  | 279.1 | 0            | 0    | 0    | 0    |
| Ahctf1   | Q8CJF7     | 12                | 13   | 12   | 9.0   | 0            | 0    | 0    | 0    |
| Ankfy1   | Q810B6     | 1                 | 1    | 1    | 0.7   | 0            | 0    | 0    | 0    |
| Anp32b   | Q9EST5     | 0                 | 3    | 2    | 1.2   | 0            | 0    | 0    | 0    |
| Arhgdia  | Q99PT1     | 1                 | 3    | 2    | 1.4   | 0            | 0    | 0    | 0    |
| Arhgef17 | Q80U35     | 2                 | 4    | 3    | 2.2   | 0            | 0    | 0    | 0    |
| Bzw1     | Q9CQC6     | 2                 | 1    | 1    | 1.0   | 0            | 0    | 0    | 0    |
| Capza1   | P47753     | 29                | 22   | 27   | 19.0  | 1            | 1    | 1    | 2.7  |
| Ccar1    | Q8CH18     | 0                 | 2    | 2    | 1.0   | 0            | 0    | 0    | 0    |
| Ccdc47   | Q9D024     | 1                 | 0    | 1    | 0.5   | 0            | 0    | 0    | 0    |
| Ccdc50   | Q810U5     | 1                 | 1    | 1    | 0.7   | 0            | 0    | 0    | 0    |
| Cend1    | P25322     | 1                 | 1    | 0    | 0.5   | 0            | 0    | 0    | 0    |
| Cdc37    | Q61081     | 1                 | 1    | 2    | 1.0   | 0            | 0    | 0    | 0    |
| Cdc42bpa | Q3UU96     | 1                 | 3    | 0    | 1.0   | 0            | 0    | 0    | 0    |
| Cdc42bpb | Q7TT50     | 1                 | 2    | 0    | 0.7   | 0            | 0    | 0    | 0    |
| Cdc42ep1 | Q91W92     | 2                 | 1    | 0    | 0.7   | 0            | 0    | 0    | 0    |
| Cdc51    | Q6A068     | 1                 | 1    | 0    | 0.5   | 0            | 0    | 0    | 0    |
| Cdk18    | Q04899     | 0                 | 1    | 1    | 0.5   | 0            | 0    | 0    | 0    |
| Cdk4     | P30285     | 1                 | 2    | 2    | 1.2   | 0            | 0    | 0    | 0    |
| Chchd3   | Q9CRB9     | 1                 | 1    | 3    | 1.2   | 0            | 0    | 0    | 0    |
| Chd4     | Q6PDQ2     | 3                 | 2    | 2    | 1.7   | 0            | 0    | 0    | 0    |
| Chordc1  | Q9D1P4     | 1                 | 1    | 1    | 0.7   | 0            | 0    | 0    | 0    |
| Chtop    | Q9CY57     | 2                 | 1    | 4    | 1.7   | 0            | 0    | 0    | 0    |
| Cops4    | O88544     | 1                 | 1    | 0    | 0.5   | 0            | 0    | 0    | 0    |
| Cpsf31   | Q9CWS4     | 0                 | 2    | 1    | 0.7   | 0            | 0    | 0    | 0    |
| Csrp1    | P97315     | 1                 | 1    | 2    | 1.0   | 0            | 0    | 0    | 0    |
| Ctnna1   | P26231     | 5                 | 2    | 5    | 2.9   | 0            | 0    | 0    | 0    |
| Cystm1   | Q8K353     | 1                 | 0    | 1    | 0.5   | 0            | 0    | 0    | 0    |
| Dctn1    | O08788     | 1                 | 1    | 1    | 0.7   | 0            | 0    | 0    | 0    |
| Ddx1     | Q91VR5     | 3                 | 5    | 4    | 2.9   | 0            | 0    | 0    | 0    |
| Ddx50    | Q99MJ9     | 1                 | 5    | 4    | 2.4   | 0            | 0    | 0    | 0    |
| Ddx6     | P54823     | 1                 | 1    | 0    | 0.5   | 0            | 0    | 0    | 0    |
| Dhx15    | O35286     | 2                 | 2    | 1    | 1.2   | 0            | 0    | 0    | 0    |
| Dnajb6   | O54946     | 0                 | 1    | 1    | 0.5   | 0            | 0    | 0    | 0    |
| Eef2     | P58252     | 19                | 21   | 19   | 14.3  | 1            | 3    | 3    | 6.0  |
| Eif1ax   | Q8BMJ3     | 1                 | 1    | 1    | 0.7   | 0            | 0    | 0    | 0    |
| Eif2s1   | Q6ZWX6     | 1                 | 2    | 1    | 1.0   | 0            | 0    | 0    | 0    |
| Eif3c    | Q8R1B4     | 3                 | 6    | 3    | 2.9   | 0            | 0    | 0    | 0    |
| Eif3d    | O70194     | 5                 | 5    | 4    | 3.4   | 0            | 0    | 0    | 0    |
| Eif3e    | P60229     | 1                 | 1    | 2    | 1.0   | 0            | 0    | 0    | 0    |

|           |        |    |    |    |      |   |   |   |     |
|-----------|--------|----|----|----|------|---|---|---|-----|
| Eif3g     | Q9Z1D1 | 3  | 3  | 2  | 1.9  | 0 | 0 | 0 | 0   |
| Eif3h     | Q91WK2 | 1  | 2  | 1  | 1.0  | 0 | 0 | 0 | 0   |
| Eif3i     | Q9QZD9 | 2  | 5  | 2  | 2.2  | 0 | 0 | 0 | 0   |
| Eif4a3    | Q91VC3 | 5  | 6  | 8  | 4.6  | 0 | 0 | 0 | 0   |
| Eif4b     | Q8BGD9 | 1  | 1  | 1  | 0.7  | 0 | 0 | 0 | 0   |
| Eif5a2    | Q8BGY2 | 1  | 0  | 1  | 0.5  | 0 | 0 | 0 | 0   |
| Emd       | O08579 | 5  | 8  | 6  | 4.6  | 0 | 0 | 0 | 0   |
| Etf1      | Q8BWW3 | 0  | 1  | 1  | 0.5  | 0 | 0 | 0 | 0   |
| Ezr       | P26040 | 20 | 20 | 19 | 14.3 | 0 | 5 | 3 | 6.6 |
| Faf2      | Q3TDN2 | 0  | 1  | 1  | 0.5  | 0 | 0 | 0 | 0   |
| Fkbp5     | Q64378 | 5  | 8  | 6  | 4.6  | 1 | 0 | 1 | 1.9 |
| Flnb      | Q80X90 | 22 | 22 | 22 | 16.0 | 2 | 2 | 5 | 7.8 |
| Fmnl2     | A2APV2 | 6  | 6  | 5  | 4.1  | 0 | 0 | 0 | 0   |
| Fus       | P56959 | 3  | 2  | 2  | 1.7  | 0 | 0 | 0 | 0   |
| G3bp1     | P97855 | 3  | 3  | 0  | 1.5  | 0 | 0 | 0 | 0   |
| Gdi2      | Q61598 | 2  | 2  | 2  | 1.5  | 0 | 0 | 0 | 0   |
| Gtf2i     | Q9ESZ8 | 1  | 0  | 2  | 0.7  | 0 | 0 | 0 | 0   |
| H2afx     | P27661 | 3  | 0  | 3  | 1.5  | 0 | 0 | 0 | 0   |
| H2afy     | Q9QZQ8 | 1  | 1  | 1  | 0.7  | 0 | 0 | 0 | 0   |
| H2afz     | P0C0S6 | 3  | 3  | 3  | 2.2  | 0 | 0 | 0 | 0   |
| Hist1h1d  | P43277 | 3  | 0  | 6  | 2.2  | 0 | 0 | 0 | 0   |
| Hist1h1e  | P43274 | 3  | 4  | 6  | 3.1  | 0 | 0 | 0 | 0   |
| Hmgb1     | P63158 | 0  | 1  | 1  | 0.5  | 0 | 0 | 0 | 0   |
| Hmgb2     | P30681 | 3  | 1  | 1  | 1.2  | 0 | 0 | 0 | 0   |
| Hnrnpa0   | Q9CX86 | 1  | 0  | 2  | 0.7  | 0 | 0 | 0 | 0   |
| Hnrnpa1   | P49312 | 5  | 6  | 5  | 3.9  | 0 | 0 | 0 | 0   |
| Hnrnpa2b1 | O88569 | 8  | 6  | 5  | 4.6  | 0 | 0 | 0 | 0   |
| Hnrnpa3   | Q8BG05 | 4  | 5  | 3  | 2.9  | 0 | 0 | 0 | 0   |
| Hnrnpab   | Q99020 | 2  | 0  | 1  | 0.7  | 0 | 0 | 0 | 0   |
| Hnrnpc    | Q9Z204 | 1  | 2  | 1  | 1.0  | 0 | 0 | 0 | 0   |
| Hnrnp1    | O35737 | 6  | 9  | 8  | 5.6  | 0 | 0 | 0 | 0   |
| Hnrnpk    | P61979 | 9  | 11 | 10 | 7.3  | 0 | 1 | 1 | 1.6 |
| Hnrnpul2  | Q00PI9 | 2  | 3  | 1  | 1.5  | 0 | 0 | 0 | 0   |
| Hp1bp3    | Q3TEA8 | 1  | 0  | 2  | 0.7  | 0 | 0 | 0 | 0   |
| Hspa4     | Q61316 | 3  | 2  | 3  | 1.9  | 0 | 0 | 0 | 0   |
| Ilk       | O55222 | 2  | 1  | 3  | 1.5  | 0 | 0 | 0 | 0   |
| Ipo7      | Q9EPL8 | 2  | 0  | 1  | 0.7  | 0 | 0 | 0 | 0   |
| Ipo9      | Q91YE6 | 0  | 1  | 4  | 1.2  | 0 | 0 | 0 | 0   |
| Khdrbs1   | Q60749 | 1  | 3  | 1  | 1.2  | 0 | 0 | 0 | 0   |
| Kiaa1671  | Q8BRV5 | 1  | 3  | 2  | 1.4  | 0 | 0 | 0 | 0   |
| Kpnb1     | P70168 | 4  | 7  | 5  | 3.9  | 0 | 0 | 0 | 0   |
| Kpna6     | O35345 | 2  | 2  | 2  | 1.5  | 0 | 0 | 0 | 0   |
| Lad1      | P57016 | 11 | 13 | 10 | 8.2  | 1 | 0 | 1 | 1.9 |
| Lbr       | Q3U9G9 | 25 | 30 | 25 | 19.4 | 0 | 2 | 2 | 3.3 |
| Lemd3     | Q9WU40 | 10 | 7  | 9  | 6.3  | 0 | 0 | 0 | 0   |
| Lima1     | Q9ERG0 | 33 | 27 | 37 | 23.5 | 0 | 0 | 0 | 0   |

|         |        |     |     |     |       |    |    |    |      |
|---------|--------|-----|-----|-----|-------|----|----|----|------|
| Lmna    | P48678 | 137 | 138 | 129 | 98.1  | 12 | 15 | 11 | 33.6 |
| Lmnb1   | P14733 | 144 | 147 | 150 | 107.0 | 0  | 0  | 0  | 0    |
| Lmnb2   | P21619 | 37  | 46  | 40  | 29.8  | 0  | 0  | 0  | 0    |
| Lrrc16a | Q6EDY6 | 1   | 1   | 0   | 0.5   | 0  | 0  | 0  | 0    |
| Lrrfip1 | Q3UZ39 | 2   | 3   | 5   | 2.4   | 0  | 0  | 0  | 0    |
| Lrrfip2 | Q91WK0 | 12  | 14  | 15  | 9.9   | 0  | 0  | 0  | 0    |
| Ltbp3   | Q61810 | 0   | 1   | 1   | 0.5   | 0  | 0  | 0  | 0    |
| Luzp1   | Q8R4U7 | 2   | 2   | 2   | 1.5   | 0  | 0  | 0  | 0    |
| Mcm3    | P25206 | 3   | 3   | 3   | 2.2   | 0  | 0  | 0  | 0    |
| Mcm6    | P97311 | 4   | 7   | 5   | 3.9   | 0  | 0  | 0  | 0    |
| Misp    | Q9D279 | 0   | 1   | 1   | 0.5   | 0  | 0  | 0  | 0    |
| Nap114  | Q78ZA7 | 1   | 1   | 1   | 0.7   | 0  | 0  | 0  | 0    |
| Ncl     | P09405 | 4   | 6   | 4   | 3.4   | 0  | 0  | 0  | 0    |
| Ndca    | Q60817 | 2   | 0   | 2   | 1.0   | 0  | 0  | 0  | 0    |
| Nup155  | Q99P88 | 0   | 1   | 2   | 0.7   | 0  | 0  | 0  | 0    |
| Nup50   | Q9JIH2 | 1   | 3   | 2   | 1.4   | 0  | 0  | 0  | 0    |
| Nup93   | Q8BJ71 | 3   | 2   | 3   | 1.9   | 0  | 0  | 0  | 0    |
| Nup98   | Q6PFD9 | 1   | 3   | 2   | 1.4   | 0  | 0  | 0  | 0    |
| Pa2g4   | P50580 | 0   | 1   | 1   | 0.5   | 0  | 0  | 0  | 0    |
| Pard6b  | Q9JK83 | 1   | 0   | 1   | 0.5   | 0  | 0  | 0  | 0    |
| Pdcd6ip | Q9WU78 | 2   | 3   | 5   | 2.4   | 0  | 0  | 0  | 0    |
| Pdzd11  | Q9CZG9 | 4   | 3   | 3   | 2.4   | 0  | 0  | 0  | 0    |
| Pgrmc1  | O55022 | 2   | 1   | 3   | 1.5   | 0  | 0  | 0  | 0    |
| Pgrmc2  | Q80UU9 | 3   | 3   | 1   | 1.7   | 0  | 0  | 0  | 0    |
| Phldb2  | Q8K1N2 | 6   | 9   | 13  | 6.8   | 1  | 0  | 2  | 2.7  |
| Plekha7 | Q3UIL6 | 26  | 23  | 22  | 17.3  | 0  | 0  | 0  | 0    |
| Poldip3 | Q8BG81 | 1   | 0   | 1   | 0.5   | 0  | 0  | 0  | 0    |
| Pom121  | Q8K3Z9 | 2   | 2   | 1   | 1.2   | 0  | 0  | 0  | 0    |
| Ptbp1   | P17225 | 3   | 2   | 2   | 1.7   | 0  | 0  | 0  | 0    |
| Ptbp3   | Q8BHD7 | 1   | 1   | 1   | 0.7   | 0  | 0  | 0  | 0    |
| Ptrf    | O54724 | 3   | 1   | 2   | 1.5   | 0  | 0  | 0  | 0    |
| Rab11b  | P46638 | 0   | 2   | 1   | 0.7   | 0  | 0  | 0  | 0    |
| Rab21   | P35282 | 1   | 1   | 0   | 0.5   | 0  | 0  | 0  | 0    |
| Rab38   | Q8QZZ8 | 3   | 1   | 2   | 1.5   | 0  | 0  | 0  | 0    |
| Rab7a   | P51150 | 1   | 1   | 1   | 0.7   | 0  | 0  | 0  | 0    |
| Rac1    | P63001 | 2   | 0   | 2   | 1.0   | 0  | 0  | 0  | 0    |
| Ralb    | Q9JIW9 | 1   | 2   | 1   | 1.0   | 0  | 0  | 0  | 0    |
| Rangap1 | P46061 | 1   | 1   | 1   | 0.7   | 0  | 0  | 0  | 0    |
| Rap1b   | Q99JI6 | 2   | 3   | 2   | 1.7   | 0  | 0  | 0  | 0    |
| Rbm7    | Q9CQT2 | 1   | 1   | 1   | 0.7   | 0  | 0  | 0  | 0    |
| Rbmx11  | Q91VM5 | 3   | 0   | 3   | 1.5   | 0  | 0  | 0  | 0    |
| Rhoa    | Q9QUI0 | 0   | 1   | 1   | 0.5   | 0  | 0  | 0  | 0    |
| Rhog    | P84096 | 2   | 1   | 1   | 1.0   | 0  | 0  | 0  | 0    |
| Rpa2    | Q62193 | 1   | 1   | 0   | 0.5   | 0  | 0  | 0  | 0    |
| Rras    | P10833 | 4   | 4   | 4   | 2.9   | 0  | 0  | 0  | 0    |
| Rras2   | P62071 | 4   | 3   | 4   | 2.7   | 0  | 0  | 0  | 0    |

|          |        |    |    |    |      |   |   |   |     |
|----------|--------|----|----|----|------|---|---|---|-----|
| Scc1     | Q5SXY1 | 21 | 16 | 17 | 13.1 | 0 | 0 | 0 | 0   |
| Scc11    | Q2KN98 | 25 | 17 | 24 | 16.0 | 0 | 0 | 0 | 0   |
| Sec61a1  | P61620 | 6  | 6  | 5  | 4.1  | 0 | 0 | 0 | 0   |
| Set      | Q9EQU5 | 2  | 1  | 3  | 1.5  | 0 | 0 | 0 | 0   |
| Sf3a1    | Q8K4Z5 | 1  | 2  | 2  | 1.2  | 0 | 0 | 0 | 0   |
| Sfpq     | Q8VIJ6 | 11 | 9  | 9  | 7.1  | 0 | 0 | 0 | 0   |
| Shkbp1   | Q6P7W2 | 1  | 1  | 1  | 0.7  | 0 | 0 | 0 | 0   |
| Sipa1    | P46062 | 6  | 6  | 6  | 4.4  | 0 | 0 | 0 | 0   |
| Sipa111  | Q8COT5 | 8  | 7  | 7  | 5.3  | 0 | 0 | 0 | 0   |
| Slc2a1   | P17809 | 1  | 1  | 1  | 0.7  | 0 | 0 | 0 | 0   |
| Slc30a7  | Q9JKN1 | 1  | 2  | 1  | 1.0  | 0 | 0 | 0 | 0   |
| Smarca5  | Q91ZW3 | 0  | 4  | 3  | 1.7  | 0 | 0 | 0 | 0   |
| Smc3     | Q9CW03 | 6  | 3  | 7  | 3.9  | 0 | 0 | 0 | 0   |
| Smc4     | Q8CG47 | 1  | 1  | 3  | 1.2  | 0 | 0 | 0 | 0   |
| Snrrp200 | Q6P4T2 | 2  | 2  | 2  | 1.5  | 0 | 0 | 0 | 0   |
| Sptan1   | P16546 | 68 | 67 | 73 | 50.5 | 0 | 0 | 0 | 0   |
| Srprb    | P47758 | 2  | 1  | 1  | 1.0  | 0 | 0 | 0 | 0   |
| Srrm2    | Q8BTI8 | 0  | 3  | 3  | 1.4  | 0 | 0 | 0 | 0   |
| Srsf1    | Q6PDM2 | 1  | 1  | 1  | 0.7  | 0 | 0 | 0 | 0   |
| Srsf2    | Q62093 | 1  | 1  | 1  | 0.7  | 0 | 0 | 0 | 0   |
| Stub1    | Q9WUD1 | 0  | 1  | 1  | 0.5  | 0 | 0 | 0 | 0   |
| Sun2     | Q8BJS4 | 0  | 1  | 1  | 0.5  | 0 | 0 | 0 | 0   |
| Supt5h   | O55201 | 2  | 2  | 2  | 1.5  | 0 | 0 | 0 | 0   |
| Tjp2     | Q9Z0U1 | 34 | 48 | 38 | 29.1 | 3 | 4 | 4 | 9.7 |
| Tm9sf3   | Q9ET30 | 1  | 1  | 1  | 0.7  | 0 | 0 | 0 | 0   |
| Tmed10   | Q9D1D4 | 1  | 2  | 1  | 1.0  | 0 | 0 | 0 | 0   |
| Tmed2    | Q9R0Q3 | 1  | 1  | 1  | 0.7  | 0 | 0 | 0 | 0   |
| Tmem106b | Q80X71 | 0  | 1  | 1  | 0.5  | 0 | 0 | 0 | 0   |
| Tmem43   | Q9DBS1 | 2  | 1  | 2  | 1.2  | 0 | 0 | 0 | 0   |
| Tmem63a  | Q91YT8 | 1  | 0  | 1  | 0.5  | 0 | 0 | 0 | 0   |
| Tmpo     | Q61029 | 59 | 44 | 49 | 37.0 | 2 | 4 | 4 | 8.6 |
| Tor1aip1 | Q921T2 | 3  | 2  | 5  | 2.4  | 0 | 0 | 0 | 0   |
| Tpr      | F6ZDS4 | 1  | 0  | 2  | 0.7  | 0 | 0 | 0 | 0   |
| Tra2b    | P62996 | 1  | 0  | 1  | 0.5  | 0 | 0 | 0 | 0   |
| Traf4    | Q61382 | 8  | 6  | 5  | 4.6  | 0 | 0 | 0 | 0   |
| Trim28   | Q62318 | 0  | 1  | 3  | 1.0  | 0 | 0 | 0 | 0   |
| U2af2    | P26369 | 1  | 0  | 1  | 0.5  | 0 | 0 | 0 | 0   |
| Uba1     | Q02053 | 6  | 7  | 5  | 4.4  | 0 | 0 | 0 | 0   |
| Uso1     | Q9Z1Z0 | 0  | 5  | 1  | 1.4  | 0 | 0 | 0 | 0   |
| Utp111   | Q9CZJ1 | 1  | 0  | 2  | 0.7  | 0 | 0 | 0 | 0   |
| Utp18    | Q5SSI6 | 0  | 1  | 1  | 0.5  | 0 | 0 | 0 | 0   |
| Vapb     | Q9QY76 | 1  | 3  | 1  | 1.2  | 0 | 0 | 0 | 0   |
| Vasp     | P70460 | 1  | 1  | 4  | 1.4  | 0 | 0 | 0 | 0   |
| Wdr82    | Q8BFQ4 | 1  | 1  | 1  | 0.7  | 0 | 0 | 0 | 0   |
| Ybx1     | P62960 | 3  | 0  | 2  | 1.2  | 0 | 0 | 0 | 0   |
| Znf185   | Q62394 | 4  | 8  | 5  | 4.1  | 0 | 0 | 0 | 0   |



|        |        |   |   |   |     |   |   |   |   |
|--------|--------|---|---|---|-----|---|---|---|---|
| Znf512 | Q69Z99 | 0 | 1 | 2 | 0.7 | 0 | 0 | 0 | 0 |
| Znf622 | Q91VY9 | 0 | 1 | 1 | 0.5 | 0 | 0 | 0 | 0 |

**Table S2.** Coordinates (mm9) of LADs in mouse liver cells as identified by DamID

| Chr  | Start    | End      |
|------|----------|----------|
| chr1 | 3590700  | 4698168  |
| chr1 | 4916174  | 6149247  |
| chr1 | 6260726  | 9504039  |
| chr1 | 11145879 | 13028380 |
| chr1 | 13761319 | 14445819 |
| chr1 | 14522876 | 14866093 |
| chr1 | 15238264 | 15768206 |
| chr1 | 16769850 | 20054293 |
| chr1 | 21298377 | 21436486 |
| chr1 | 21671987 | 23126335 |
| chr1 | 23439074 | 23859358 |
| chr1 | 24147814 | 24686290 |
| chr1 | 24810706 | 27601891 |
| chr1 | 27658933 | 30773025 |
| chr1 | 31256331 | 33454991 |
| chr1 | 34509378 | 34829277 |
| chr1 | 34970167 | 35824149 |
| chr1 | 38259145 | 39383729 |
| chr1 | 40637524 | 41582923 |
| chr1 | 41664953 | 42912447 |
| chr1 | 42982097 | 43124690 |
| chr1 | 44224734 | 45823809 |
| chr1 | 46983127 | 50964213 |
| chr1 | 52044304 | 52146469 |
| chr1 | 52913599 | 53719493 |
| chr1 | 53954474 | 54576405 |
| chr1 | 55237047 | 56562121 |
| chr1 | 57031280 | 57403351 |
| chr1 | 60963909 | 61284650 |
| chr1 | 61343484 | 62712596 |
| chr1 | 63288208 | 63400830 |
| chr1 | 65329180 | 66721347 |
| chr1 | 67141298 | 69348189 |
| chr1 | 69741433 | 70650823 |
| chr1 | 70724208 | 70855701 |
| chr1 | 71188906 | 71413345 |
| chr1 | 75767642 | 76681700 |
| chr1 | 78743485 | 79633798 |

|      |           |           |
|------|-----------|-----------|
| chr1 | 80698356  | 80812030  |
| chr1 | 80871186  | 81304745  |
| chr1 | 83175061  | 84710421  |
| chr1 | 95895750  | 96251134  |
| chr1 | 96860270  | 97585510  |
| chr1 | 97649529  | 99485029  |
| chr1 | 100114467 | 101759014 |
| chr1 | 101852774 | 106993251 |
| chr1 | 107257942 | 107488078 |
| chr1 | 108761989 | 109593180 |
| chr1 | 110088631 | 114627348 |
| chr1 | 115296247 | 118076358 |
| chr1 | 118367486 | 119471376 |
| chr1 | 122705036 | 123145030 |
| chr1 | 123435862 | 127251194 |
| chr1 | 127767831 | 128474785 |
| chr1 | 129167657 | 129309020 |
| chr1 | 129369160 | 129621426 |
| chr1 | 130338551 | 131122652 |
| chr1 | 131367385 | 132537622 |
| chr1 | 134545432 | 134651655 |
| chr1 | 138948338 | 139452055 |
| chr1 | 141054627 | 144411636 |
| chr1 | 144641591 | 145444908 |
| chr1 | 145642012 | 146142591 |
| chr1 | 146207363 | 147682856 |
| chr1 | 148359083 | 151657452 |
| chr1 | 152114799 | 152868188 |
| chr1 | 155421403 | 155539628 |
| chr1 | 156023837 | 156461554 |
| chr1 | 156571160 | 156839417 |
| chr1 | 159836200 | 161150172 |
| chr1 | 164702094 | 165025861 |
| chr1 | 165095642 | 165291636 |
| chr1 | 165386148 | 166111285 |
| chr1 | 166641514 | 167105894 |
| chr1 | 168251695 | 168688218 |
| chr1 | 168970024 | 169125432 |
| chr1 | 169327936 | 170105788 |
| chr1 | 170717534 | 171602382 |
| chr1 | 171735266 | 172037044 |
| chr1 | 172179783 | 172310372 |
| chr1 | 173429815 | 173928554 |
| chr1 | 174472344 | 174589056 |
| chr1 | 174972286 | 175317650 |
| chr1 | 175885652 | 178627921 |

|       |           |           |
|-------|-----------|-----------|
| chr1  | 180388768 | 181406639 |
| chr1  | 183217628 | 183736446 |
| chr1  | 183820243 | 184011457 |
| chr1  | 184484487 | 184825716 |
| chr1  | 186754249 | 186977331 |
| chr1  | 187245773 | 188031019 |
| chr1  | 188574264 | 189038120 |
| chr1  | 189144364 | 191494002 |
| chr1  | 191983318 | 192637583 |
| chr1  | 193988400 | 194233624 |
| chr1  | 194318074 | 194519024 |
| chr1  | 195388491 | 196405560 |
| chr1  | 196927533 | 197158929 |
| chr10 | 3341066   | 4484760   |
| chr10 | 4684117   | 5046372   |
| chr10 | 5292830   | 5729579   |
| chr10 | 6399406   | 7228769   |
| chr10 | 7707772   | 8562594   |
| chr10 | 8628656   | 9200033   |
| chr10 | 9344559   | 10164943  |
| chr10 | 10268772  | 10892469  |
| chr10 | 11034890  | 11790093  |
| chr10 | 12753549  | 13101268  |
| chr10 | 14442901  | 14624825  |
| chr10 | 14932515  | 15211183  |
| chr10 | 18300556  | 18516207  |
| chr10 | 20092659  | 20965318  |
| chr10 | 22496098  | 23452401  |
| chr10 | 28295936  | 29006497  |
| chr10 | 29139230  | 29248740  |
| chr10 | 29591222  | 29955433  |
| chr10 | 30567782  | 31021125  |
| chr10 | 31376788  | 32426204  |
| chr10 | 33427517  | 33986029  |
| chr10 | 34392076  | 36150063  |
| chr10 | 36201018  | 36790468  |
| chr10 | 37384410  | 39220905  |
| chr10 | 40292865  | 40517737  |
| chr10 | 40663042  | 40958429  |
| chr10 | 44883406  | 47502119  |
| chr10 | 48710835  | 49088342  |
| chr10 | 49440758  | 50243180  |
| chr10 | 50483045  | 51384312  |
| chr10 | 52189080  | 53060255  |
| chr10 | 53221111  | 53670557  |
| chr10 | 54294209  | 57164646  |

|       |           |           |
|-------|-----------|-----------|
| chr10 | 57266330  | 57564762  |
| chr10 | 58049727  | 58584278  |
| chr10 | 61356272  | 61494455  |
| chr10 | 62880492  | 63931786  |
| chr10 | 64581673  | 65303207  |
| chr10 | 69808957  | 69979839  |
| chr10 | 70873305  | 74101975  |
| chr10 | 74312055  | 74495532  |
| chr10 | 78099518  | 78968588  |
| chr10 | 82394516  | 82786395  |
| chr10 | 83142911  | 83598125  |
| chr10 | 84680882  | 85135539  |
| chr10 | 86319082  | 87089221  |
| chr10 | 87938347  | 88171895  |
| chr10 | 88282722  | 88810638  |
| chr10 | 89265509  | 90476368  |
| chr10 | 90707289  | 92475194  |
| chr10 | 93717139  | 93861675  |
| chr10 | 94265634  | 94511980  |
| chr10 | 96914979  | 97567179  |
| chr10 | 99647586  | 101930567 |
| chr10 | 102237804 | 107233295 |
| chr10 | 108139110 | 110383538 |
| chr10 | 111463070 | 114648885 |
| chr10 | 114915204 | 115118981 |
| chr10 | 115309866 | 115485299 |
| chr10 | 115780159 | 115926286 |
| chr10 | 116050606 | 116332606 |
| chr10 | 116640449 | 116740812 |
| chr10 | 117322103 | 118228045 |
| chr10 | 118496765 | 119532278 |
| chr10 | 120426439 | 120795307 |
| chr10 | 121051117 | 122446818 |
| chr10 | 122603233 | 126350089 |
| chr10 | 128465419 | 129958117 |
| chr11 | 6722867   | 7107617   |
| chr11 | 8891353   | 11698397  |
| chr11 | 11890093  | 12065221  |
| chr11 | 12428085  | 16379048  |
| chr11 | 16868342  | 17033310  |
| chr11 | 17164263  | 18801049  |
| chr11 | 18944636  | 19665526  |
| chr11 | 21498715  | 21990810  |
| chr11 | 23843239  | 28695745  |
| chr11 | 29793210  | 29944352  |
| chr11 | 30245705  | 30621308  |

|       |           |           |
|-------|-----------|-----------|
| chr11 | 33057505  | 33479259  |
| chr11 | 33821001  | 35450124  |
| chr11 | 35845035  | 38516073  |
| chr11 | 38729239  | 39987444  |
| chr11 | 40631910  | 43169313  |
| chr11 | 44377998  | 45565694  |
| chr11 | 45756055  | 48567559  |
| chr11 | 49119102  | 49357300  |
| chr11 | 50511476  | 51037190  |
| chr11 | 51118141  | 51331207  |
| chr11 | 52442473  | 53042859  |
| chr11 | 55343029  | 57266986  |
| chr11 | 58170360  | 58680125  |
| chr11 | 62491768  | 63626905  |
| chr11 | 63753000  | 65018088  |
| chr11 | 65640119  | 66806103  |
| chr11 | 66892213  | 67224964  |
| chr11 | 67500082  | 67617708  |
| chr11 | 70879134  | 71801584  |
| chr11 | 73149279  | 74195763  |
| chr11 | 80662892  | 81188708  |
| chr11 | 81267357  | 81755256  |
| chr11 | 82037530  | 82568558  |
| chr11 | 88965771  | 90440315  |
| chr11 | 90558515  | 93698169  |
| chr11 | 96257780  | 96589279  |
| chr11 | 99632383  | 99861556  |
| chr11 | 103324286 | 103721397 |
| chr11 | 103884097 | 104082099 |
| chr11 | 104537978 | 104804689 |
| chr11 | 105168945 | 105760147 |
| chr11 | 107078445 | 107275363 |
| chr11 | 107529068 | 107863389 |
| chr11 | 108283617 | 109174580 |
| chr11 | 110906129 | 112658187 |
| chr11 | 113177187 | 113328500 |
| chr11 | 113646228 | 114476846 |
| chr11 | 114908370 | 115014046 |
| chr11 | 118567596 | 118787176 |
| chr12 | 3960580   | 4083136   |
| chr12 | 5017104   | 7794515   |
| chr12 | 9061781   | 9539309   |
| chr12 | 10240672  | 10861413  |
| chr12 | 11013672  | 11266384  |
| chr12 | 11347982  | 12813318  |
| chr12 | 13312798  | 13623590  |

|       |           |           |
|-------|-----------|-----------|
| chr12 | 14593061  | 15917507  |
| chr12 | 16136615  | 16486615  |
| chr12 | 25474815  | 25582318  |
| chr12 | 26585257  | 27108959  |
| chr12 | 27228274  | 27705396  |
| chr12 | 28986787  | 29233988  |
| chr12 | 30006640  | 31540742  |
| chr12 | 34122388  | 34690928  |
| chr12 | 35160509  | 35325514  |
| chr12 | 36625731  | 36834348  |
| chr12 | 36911274  | 40686818  |
| chr12 | 42053696  | 42293634  |
| chr12 | 42675687  | 42960472  |
| chr12 | 43104780  | 45318817  |
| chr12 | 45405494  | 45908380  |
| chr12 | 46290750  | 50427235  |
| chr12 | 51354179  | 52399961  |
| chr12 | 54054354  | 55197380  |
| chr12 | 56647082  | 56794603  |
| chr12 | 57498509  | 58555327  |
| chr12 | 58661488  | 59901599  |
| chr12 | 60350189  | 61245209  |
| chr12 | 61432536  | 64360285  |
| chr12 | 64417497  | 66002705  |
| chr12 | 66225934  | 66533252  |
| chr12 | 66648205  | 70228089  |
| chr12 | 71266037  | 71498122  |
| chr12 | 72283920  | 72874051  |
| chr12 | 73179215  | 73553741  |
| chr12 | 73629428  | 73795172  |
| chr12 | 73919944  | 74095711  |
| chr12 | 74625016  | 74810419  |
| chr12 | 75104635  | 76495860  |
| chr12 | 82109494  | 82553068  |
| chr12 | 82660340  | 83077522  |
| chr12 | 83643491  | 84246725  |
| chr12 | 84706896  | 84839343  |
| chr12 | 87640247  | 88091386  |
| chr12 | 89552584  | 92212503  |
| chr12 | 92322364  | 92779066  |
| chr12 | 93153107  | 96502930  |
| chr12 | 96906862  | 99883004  |
| chr12 | 100661301 | 101125626 |
| chr12 | 101180344 | 101346661 |
| chr12 | 102352312 | 103104891 |
| chr12 | 104107341 | 105063971 |

|       |           |           |
|-------|-----------|-----------|
| chr12 | 105304931 | 105437253 |
| chr12 | 105514540 | 105916981 |
| chr12 | 106037658 | 106143971 |
| chr12 | 106323310 | 106749878 |
| chr12 | 107110359 | 109301999 |
| chr12 | 110216947 | 111047582 |
| chr12 | 113244299 | 113467716 |
| chr12 | 114465820 | 115910043 |
| chr12 | 116043128 | 116304669 |
| chr12 | 117047345 | 117388576 |
| chr12 | 117851748 | 119883407 |
| chr12 | 120061601 | 120583311 |
| chr12 | 120644196 | 121257242 |
| chr13 | 4407450   | 4577183   |
| chr13 | 6696075   | 8802938   |
| chr13 | 9867659   | 10966416  |
| chr13 | 11175552  | 12493843  |
| chr13 | 14775019  | 15638720  |
| chr13 | 18454655  | 18744221  |
| chr13 | 18987234  | 19288429  |
| chr13 | 20388176  | 21232054  |
| chr13 | 21634941  | 21762981  |
| chr13 | 22204047  | 22773356  |
| chr13 | 22918841  | 23328719  |
| chr13 | 25287475  | 25689726  |
| chr13 | 36464311  | 37512488  |
| chr13 | 38352355  | 38618775  |
| chr13 | 38779128  | 40601276  |
| chr13 | 41151186  | 41312463  |
| chr13 | 43675651  | 44775872  |
| chr13 | 45136696  | 45632843  |
| chr13 | 46318466  | 46764248  |
| chr13 | 47250781  | 48555714  |
| chr13 | 50488724  | 50611081  |
| chr13 | 51468241  | 51712405  |
| chr13 | 53182198  | 53405790  |
| chr13 | 54251711  | 54505894  |
| chr13 | 56336722  | 56459662  |
| chr13 | 56917942  | 58059056  |
| chr13 | 58778815  | 59481898  |
| chr13 | 60241451  | 60445183  |
| chr13 | 61099055  | 61730785  |
| chr13 | 64529772  | 65409381  |
| chr13 | 67076779  | 67196173  |
| chr13 | 67875397  | 68013637  |
| chr13 | 68697755  | 69540626  |

|       |           |           |
|-------|-----------|-----------|
| chr13 | 69793263  | 70703122  |
| chr13 | 71173369  | 73463423  |
| chr13 | 74080598  | 74400514  |
| chr13 | 76292890  | 78792122  |
| chr13 | 78883805  | 81005479  |
| chr13 | 81176866  | 81786119  |
| chr13 | 81897267  | 85330309  |
| chr13 | 85677253  | 89579244  |
| chr13 | 89685416  | 89794165  |
| chr13 | 93493878  | 93941869  |
| chr13 | 93996146  | 94146024  |
| chr13 | 94231542  | 94541135  |
| chr13 | 95638352  | 96061820  |
| chr13 | 96149687  | 97119998  |
| chr13 | 101635500 | 102263156 |
| chr13 | 103425662 | 103638773 |
| chr13 | 103713673 | 104501170 |
| chr13 | 105576009 | 105976914 |
| chr13 | 106179920 | 107687031 |
| chr13 | 107845478 | 108260267 |
| chr13 | 109561557 | 109964352 |
| chr13 | 110658024 | 111155222 |
| chr13 | 112636826 | 113037822 |
| chr13 | 113310654 | 114336217 |
| chr13 | 114434791 | 115049477 |
| chr13 | 116052890 | 117684837 |
| chr13 | 117964583 | 118417315 |
| chr13 | 118568375 | 120169204 |
| chr14 | 9301037   | 12287279  |
| chr14 | 13017589  | 13818978  |
| chr14 | 13889733  | 14787718  |
| chr14 | 14982730  | 15269748  |
| chr14 | 15668928  | 17032544  |
| chr14 | 17535883  | 18034800  |
| chr14 | 20445376  | 20859257  |
| chr14 | 22941487  | 24545299  |
| chr14 | 28411297  | 30726600  |
| chr14 | 30982559  | 31275874  |
| chr14 | 33529515  | 33744771  |
| chr14 | 33816118  | 34009486  |
| chr14 | 34356997  | 34830860  |
| chr14 | 35620504  | 37351237  |
| chr14 | 37996198  | 41697444  |
| chr14 | 45361210  | 45878349  |
| chr14 | 49217099  | 49510068  |
| chr14 | 49862656  | 51398492  |



|       |           |           |
|-------|-----------|-----------|
| chr14 | 51733037  | 52169393  |
| chr14 | 52943977  | 53385238  |
| chr14 | 54156327  | 54640905  |
| chr14 | 55828540  | 56028567  |
| chr14 | 56952927  | 57135411  |
| chr14 | 58575408  | 58783778  |
| chr14 | 59153509  | 59767512  |
| chr14 | 60223128  | 60837747  |
| chr14 | 60935849  | 61162113  |
| chr14 | 63011543  | 63145424  |
| chr14 | 67858009  | 68166674  |
| chr14 | 68658017  | 69823020  |
| chr14 | 71316847  | 72065277  |
| chr14 | 72424204  | 72945675  |
| chr14 | 72999589  | 73325096  |
| chr14 | 75462818  | 75637356  |
| chr14 | 75797143  | 76077024  |
| chr14 | 77466461  | 78733591  |
| chr14 | 78950155  | 79149313  |
| chr14 | 80057903  | 80332756  |
| chr14 | 80507115  | 80862096  |
| chr14 | 81142925  | 83279932  |
| chr14 | 83483354  | 84836893  |
| chr14 | 84900686  | 87484161  |
| chr14 | 87829210  | 91702819  |
| chr14 | 92511967  | 93182313  |
| chr14 | 93689688  | 94087311  |
| chr14 | 94137979  | 96956251  |
| chr14 | 97265490  | 99431891  |
| chr14 | 100298658 | 101763517 |
| chr14 | 101816688 | 101993522 |
| chr14 | 102556999 | 103432136 |
| chr14 | 103919130 | 105510724 |
| chr14 | 106320961 | 108271555 |
| chr14 | 108709094 | 117277689 |
| chr14 | 117447950 | 118493144 |
| chr14 | 118577165 | 118875424 |
| chr14 | 119428062 | 120607159 |
| chr14 | 120884290 | 121156845 |
| chr14 | 123735928 | 125178134 |
| chr15 | 4007244   | 5039237   |
| chr15 | 5738477   | 6135762   |
| chr15 | 7169355   | 7382392   |
| chr15 | 8437294   | 8841221   |
| chr15 | 9056433   | 10530800  |
| chr15 | 10682074  | 11621197  |

|       |           |           |
|-------|-----------|-----------|
| chr15 | 11691796  | 11875779  |
| chr15 | 12307911  | 12685780  |
| chr15 | 13888765  | 16181601  |
| chr15 | 16680779  | 20561707  |
| chr15 | 21152468  | 24538318  |
| chr15 | 24599101  | 25001391  |
| chr15 | 26020188  | 27258599  |
| chr15 | 28101914  | 31068309  |
| chr15 | 31557767  | 32877273  |
| chr15 | 33061479  | 33224276  |
| chr15 | 34498753  | 34906562  |
| chr15 | 35867069  | 36059896  |
| chr15 | 38796060  | 39591600  |
| chr15 | 39659478  | 39986886  |
| chr15 | 40426525  | 40990864  |
| chr15 | 41719358  | 50047569  |
| chr15 | 50103391  | 50953037  |
| chr15 | 51004254  | 51508748  |
| chr15 | 51842192  | 52294551  |
| chr15 | 52347925  | 52587951  |
| chr15 | 53567976  | 54273384  |
| chr15 | 54511528  | 54865934  |
| chr15 | 55142047  | 55908573  |
| chr15 | 55983520  | 57348091  |
| chr15 | 64515081  | 64783121  |
| chr15 | 65625870  | 66314340  |
| chr15 | 67308044  | 67971918  |
| chr15 | 68233390  | 69105966  |
| chr15 | 69301431  | 72667478  |
| chr15 | 74599685  | 74726639  |
| chr15 | 82398052  | 82610465  |
| chr15 | 83452867  | 83987684  |
| chr15 | 84038715  | 84273836  |
| chr15 | 86279684  | 87398734  |
| chr15 | 87873268  | 88465481  |
| chr15 | 89338495  | 90055459  |
| chr15 | 90290606  | 90400657  |
| chr15 | 90474080  | 93092686  |
| chr15 | 93281962  | 94370426  |
| chr15 | 94437231  | 95572026  |
| chr15 | 96342520  | 97477919  |
| chr15 | 98016822  | 98332273  |
| chr15 | 100498383 | 100893154 |
| chr15 | 101376490 | 101767113 |
| chr15 | 102652035 | 102923684 |
| chr15 | 103257417 | 103465445 |

|       |          |          |
|-------|----------|----------|
| chr16 | 5502770  | 6835665  |
| chr16 | 7014352  | 7541510  |
| chr16 | 7744375  | 8596161  |
| chr16 | 9343637  | 10388201 |
| chr16 | 12185957 | 12999829 |
| chr16 | 16671775 | 16810965 |
| chr16 | 19002262 | 20050264 |
| chr16 | 21116723 | 21308338 |
| chr16 | 21442358 | 21719816 |
| chr16 | 22404258 | 22524769 |
| chr16 | 25650693 | 26181532 |
| chr16 | 26418925 | 26574071 |
| chr16 | 26633874 | 27335510 |
| chr16 | 27484329 | 29578554 |
| chr16 | 35171655 | 35273727 |
| chr16 | 35409674 | 35683637 |
| chr16 | 36126741 | 36830814 |
| chr16 | 36949637 | 37487974 |
| chr16 | 39187070 | 42444791 |
| chr16 | 42606404 | 42819913 |
| chr16 | 44236568 | 44675081 |
| chr16 | 45485493 | 45589723 |
| chr16 | 46123660 | 46509712 |
| chr16 | 46983012 | 49504773 |
| chr16 | 50528034 | 50658889 |
| chr16 | 50786584 | 51965658 |
| chr16 | 52503560 | 55185248 |
| chr16 | 56159606 | 57104903 |
| chr16 | 57740741 | 58266150 |
| chr16 | 58698163 | 64759610 |
| chr16 | 64881079 | 69698730 |
| chr16 | 69805989 | 71285856 |
| chr16 | 72218539 | 72607632 |
| chr16 | 72959325 | 75727853 |
| chr16 | 75798141 | 76134773 |
| chr16 | 76579897 | 76959460 |
| chr16 | 77703524 | 78181101 |
| chr16 | 78420598 | 84598611 |
| chr16 | 85307955 | 85630047 |
| chr16 | 87528759 | 87640394 |
| chr16 | 87765210 | 88362011 |
| chr16 | 88563078 | 90204832 |
| chr16 | 90303192 | 90916915 |
| chr16 | 91075181 | 91322783 |
| chr16 | 93316374 | 93535000 |
| chr16 | 94934788 | 95818965 |

|       |          |          |
|-------|----------|----------|
| chr16 | 96392824 | 96585569 |
| chr16 | 96645412 | 97474141 |
| chr17 | 3561382  | 4671374  |
| chr17 | 5445792  | 5765549  |
| chr17 | 7645901  | 7940377  |
| chr17 | 8611666  | 9956528  |
| chr17 | 10550534 | 10873814 |
| chr17 | 10963028 | 12241932 |
| chr17 | 12752849 | 12858997 |
| chr17 | 14345236 | 14977648 |
| chr17 | 15974655 | 17112270 |
| chr17 | 17547265 | 17653376 |
| chr17 | 18034585 | 21114645 |
| chr17 | 21361796 | 21536908 |
| chr17 | 21844008 | 22049218 |
| chr17 | 22474686 | 23104516 |
| chr17 | 23292477 | 23627844 |
| chr17 | 30840183 | 31170917 |
| chr17 | 32737460 | 32838122 |
| chr17 | 36459978 | 36924489 |
| chr17 | 37220328 | 39481104 |
| chr17 | 40337106 | 42889944 |
| chr17 | 43585907 | 43763697 |
| chr17 | 43878923 | 44177473 |
| chr17 | 48258309 | 48456635 |
| chr17 | 48558407 | 49557129 |
| chr17 | 49641348 | 50501236 |
| chr17 | 50696322 | 51127379 |
| chr17 | 51345007 | 53615839 |
| chr17 | 54285103 | 56044176 |
| chr17 | 57514430 | 59197991 |
| chr17 | 59407949 | 62114856 |
| chr17 | 63233040 | 63623853 |
| chr17 | 65000054 | 65897521 |
| chr17 | 66966779 | 71022753 |
| chr17 | 72042446 | 73128475 |
| chr17 | 76425082 | 78583089 |
| chr17 | 78869494 | 79015758 |
| chr17 | 79476665 | 79943164 |
| chr17 | 81433805 | 82252823 |
| chr17 | 82737697 | 83554403 |
| chr17 | 83943831 | 84058559 |
| chr17 | 84875088 | 85102878 |
| chr17 | 85502333 | 86253973 |
| chr17 | 86335517 | 86486801 |
| chr17 | 86990264 | 87124056 |

|       |          |          |
|-------|----------|----------|
| chr17 | 88479947 | 88832932 |
| chr17 | 89054008 | 91348901 |
| chr17 | 91419015 | 91737083 |
| chr17 | 91884470 | 95254916 |
| chr18 | 3181133  | 3334145  |
| chr18 | 7038079  | 7552535  |
| chr18 | 9576038  | 9909111  |
| chr18 | 12636939 | 12738208 |
| chr18 | 13165403 | 13525645 |
| chr18 | 13707642 | 14646591 |
| chr18 | 15013142 | 16394176 |
| chr18 | 17328337 | 19758141 |
| chr18 | 20080760 | 20478260 |
| chr18 | 21485613 | 23900271 |
| chr18 | 26458693 | 31683571 |
| chr18 | 32649572 | 33337387 |
| chr18 | 34028875 | 34144085 |
| chr18 | 37037161 | 37918393 |
| chr18 | 40399960 | 42370631 |
| chr18 | 43605369 | 44004398 |
| chr18 | 44065315 | 44534992 |
| chr18 | 45011307 | 46110218 |
| chr18 | 46981665 | 49893273 |
| chr18 | 50310387 | 51274712 |
| chr18 | 51525467 | 53292667 |
| chr18 | 53599615 | 53801815 |
| chr18 | 54157747 | 54738196 |
| chr18 | 55533200 | 56483335 |
| chr18 | 58116226 | 59311485 |
| chr18 | 59499544 | 60611917 |
| chr18 | 62231037 | 62640112 |
| chr18 | 62717505 | 63791092 |
| chr18 | 66719782 | 67354328 |
| chr18 | 68028091 | 69503415 |
| chr18 | 69554235 | 69851799 |
| chr18 | 70819288 | 71725794 |
| chr18 | 71829460 | 73705596 |
| chr18 | 74451227 | 74585118 |
| chr18 | 74726124 | 74889177 |
| chr18 | 75929523 | 76337367 |
| chr18 | 76772324 | 77160220 |
| chr18 | 77220595 | 77837544 |
| chr18 | 78567743 | 79366522 |
| chr18 | 79450605 | 80263195 |
| chr18 | 81179770 | 82614899 |
| chr18 | 83183354 | 84247770 |

|       |          |          |
|-------|----------|----------|
| chr18 | 84315929 | 84454628 |
| chr18 | 85115458 | 85534525 |
| chr18 | 85623212 | 87943695 |
| chr18 | 88240254 | 88530372 |
| chr18 | 89233685 | 89576738 |
| chr18 | 89642171 | 90390091 |
| chr19 | 7683384  | 7929213  |
| chr19 | 8447990  | 8726497  |
| chr19 | 11231255 | 11396474 |
| chr19 | 12113822 | 12494818 |
| chr19 | 12917983 | 13531486 |
| chr19 | 13588084 | 14531543 |
| chr19 | 14786777 | 15396996 |
| chr19 | 15461353 | 15955278 |
| chr19 | 17487983 | 18628326 |
| chr19 | 20839635 | 21132034 |
| chr19 | 21403228 | 21622100 |
| chr19 | 21993355 | 22985868 |
| chr19 | 23392083 | 23564178 |
| chr19 | 23758517 | 23918161 |
| chr19 | 25018857 | 26807914 |
| chr19 | 30299411 | 32141663 |
| chr19 | 33099069 | 33724977 |
| chr19 | 33918952 | 34224080 |
| chr19 | 35035368 | 36159134 |
| chr19 | 36348932 | 36705845 |
| chr19 | 38523365 | 38857608 |
| chr19 | 39048726 | 39657410 |
| chr19 | 40000801 | 40384434 |
| chr19 | 40679030 | 41262489 |
| chr19 | 42396637 | 42554078 |
| chr19 | 42862779 | 43492805 |
| chr19 | 48007171 | 53093972 |
| chr19 | 53198502 | 53338092 |
| chr19 | 54169427 | 54634355 |
| chr19 | 57738464 | 58474803 |
| chr19 | 58565442 | 59358618 |
| chr19 | 59456278 | 59821810 |
| chr19 | 60272060 | 60528469 |
| chr2  | 4600004  | 4746515  |
| chr2  | 7160043  | 8700950  |
| chr2  | 9244409  | 9539283  |
| chr2  | 10065678 | 11244159 |
| chr2  | 11508872 | 11619011 |
| chr2  | 11762607 | 12341927 |
| chr2  | 12841110 | 13163977 |

|      |           |           |
|------|-----------|-----------|
| chr2 | 14243591  | 14445802  |
| chr2 | 14659773  | 14956339  |
| chr2 | 15138276  | 16256900  |
| chr2 | 16880662  | 17917140  |
| chr2 | 18653890  | 18799940  |
| chr2 | 19018321  | 19437668  |
| chr2 | 19653729  | 20344556  |
| chr2 | 21228284  | 22471284  |
| chr2 | 22608079  | 22742578  |
| chr2 | 23060489  | 24099689  |
| chr2 | 35642945  | 35783070  |
| chr2 | 36173208  | 37180794  |
| chr2 | 39111338  | 44447815  |
| chr2 | 44539956  | 44672784  |
| chr2 | 45018955  | 45320205  |
| chr2 | 45536802  | 48154894  |
| chr2 | 49973428  | 50078973  |
| chr2 | 51310053  | 51698860  |
| chr2 | 51962543  | 52231363  |
| chr2 | 52358925  | 52516698  |
| chr2 | 53084717  | 57012815  |
| chr2 | 57211427  | 58298726  |
| chr2 | 58610245  | 58819892  |
| chr2 | 61635283  | 62478275  |
| chr2 | 63234923  | 64893950  |
| chr2 | 65159611  | 65892023  |
| chr2 | 66049040  | 66379056  |
| chr2 | 66548318  | 68635137  |
| chr2 | 69021761  | 69129619  |
| chr2 | 69322563  | 69457777  |
| chr2 | 69905492  | 70457759  |
| chr2 | 71788455  | 71895810  |
| chr2 | 73771634  | 74981610  |
| chr2 | 75869090  | 77059700  |
| chr2 | 77179079  | 77874899  |
| chr2 | 78779362  | 79345063  |
| chr2 | 79515425  | 80074135  |
| chr2 | 80204817  | 80324705  |
| chr2 | 80491926  | 81971646  |
| chr2 | 82186598  | 83441117  |
| chr2 | 83714375  | 84244978  |
| chr2 | 85100886  | 87690580  |
| chr2 | 88134124  | 90138924  |
| chr2 | 94303918  | 95299592  |
| chr2 | 96072391  | 100281253 |
| chr2 | 100623441 | 101485262 |

|      |           |           |
|------|-----------|-----------|
| chr2 | 104037462 | 104144218 |
| chr2 | 105061823 | 106798932 |
| chr2 | 107207459 | 107814096 |
| chr2 | 110048404 | 112045630 |
| chr2 | 112340785 | 113148484 |
| chr2 | 113522043 | 113628463 |
| chr2 | 113793025 | 115295760 |
| chr2 | 115880080 | 116731443 |
| chr2 | 121452712 | 121755959 |
| chr2 | 122228197 | 122479149 |
| chr2 | 122629281 | 124445034 |
| chr2 | 125108582 | 125380687 |
| chr2 | 127744287 | 127894669 |
| chr2 | 129148821 | 130094431 |
| chr2 | 132174966 | 132316094 |
| chr2 | 132821980 | 133267277 |
| chr2 | 133731289 | 136432606 |
| chr2 | 136521906 | 136666460 |
| chr2 | 138094580 | 139740508 |
| chr2 | 140021846 | 140498046 |
| chr2 | 140777227 | 142439613 |
| chr2 | 142907503 | 143674428 |
| chr2 | 144419479 | 145045786 |
| chr2 | 145106317 | 145412903 |
| chr2 | 146476172 | 146768986 |
| chr2 | 146913713 | 147265827 |
| chr2 | 148756020 | 150571199 |
| chr2 | 150783015 | 150999942 |
| chr2 | 151432831 | 151744901 |
| chr2 | 151865839 | 152001997 |
| chr2 | 152240767 | 152418718 |
| chr2 | 153724800 | 154154568 |
| chr2 | 158462940 | 158575954 |
| chr2 | 158681511 | 160436083 |
| chr2 | 162394862 | 162747976 |
| chr2 | 162923315 | 163184661 |
| chr2 | 163685421 | 163791335 |
| chr2 | 163995450 | 164184876 |
| chr2 | 166066104 | 166554901 |
| chr2 | 168432788 | 169912124 |
| chr2 | 170084473 | 170209058 |
| chr2 | 170354069 | 172150816 |
| chr2 | 172326495 | 172812602 |
| chr2 | 172898934 | 173022755 |
| chr2 | 173167891 | 173433117 |
| chr2 | 173631883 | 174229031 |



|      |           |           |
|------|-----------|-----------|
| chr2 | 174323151 | 174775580 |
| chr2 | 177829754 | 179621693 |
| chr3 | 3267739   | 3717667   |
| chr3 | 4227567   | 4630424   |
| chr3 | 5605171   | 7318353   |
| chr3 | 7782376   | 8629250   |
| chr3 | 10478693  | 12707165  |
| chr3 | 12796893  | 13831867  |
| chr3 | 16167070  | 19007344  |
| chr3 | 19466762  | 19586447  |
| chr3 | 20001057  | 21179416  |
| chr3 | 22129403  | 22975106  |
| chr3 | 23080886  | 23460602  |
| chr3 | 23530931  | 24169317  |
| chr3 | 24266944  | 26931997  |
| chr3 | 28855628  | 29644306  |
| chr3 | 30125482  | 30383466  |
| chr3 | 31049550  | 31502026  |
| chr3 | 31624566  | 32124679  |
| chr3 | 32669621  | 33826984  |
| chr3 | 34018563  | 35601158  |
| chr3 | 36824427  | 37107565  |
| chr3 | 38743866  | 40369541  |
| chr3 | 41446006  | 42383989  |
| chr3 | 42802216  | 50195262  |
| chr3 | 52802656  | 53195567  |
| chr3 | 53276130  | 54256852  |
| chr3 | 54599267  | 56749418  |
| chr3 | 58566540  | 59255878  |
| chr3 | 59340534  | 59880745  |
| chr3 | 60477308  | 61028478  |
| chr3 | 61276105  | 61902400  |
| chr3 | 62322047  | 62986255  |
| chr3 | 65972759  | 67856204  |
| chr3 | 69335167  | 69460723  |
| chr3 | 69747267  | 70009202  |
| chr3 | 70171966  | 75185539  |
| chr3 | 75390086  | 75516043  |
| chr3 | 75811641  | 78744989  |
| chr3 | 79461031  | 79595364  |
| chr3 | 79869077  | 80772122  |
| chr3 | 81699057  | 83592772  |
| chr3 | 85043874  | 85284526  |
| chr3 | 86633255  | 86780315  |
| chr3 | 87113808  | 87265629  |
| chr3 | 91744835  | 91908021  |

|      |           |           |
|------|-----------|-----------|
| chr3 | 92533416  | 92840450  |
| chr3 | 92899170  | 93284265  |
| chr3 | 98511297  | 98944746  |
| chr3 | 99045695  | 99961513  |
| chr3 | 100121500 | 100398726 |
| chr3 | 105041338 | 105471664 |
| chr3 | 105757227 | 106237540 |
| chr3 | 106645148 | 107040686 |
| chr3 | 109568503 | 113029298 |
| chr3 | 113236149 | 115582416 |
| chr3 | 116850894 | 119386610 |
| chr3 | 119870111 | 120964123 |
| chr3 | 122402195 | 122558555 |
| chr3 | 123108667 | 123213631 |
| chr3 | 123425428 | 124987177 |
| chr3 | 125085194 | 125557153 |
| chr3 | 126681983 | 127444801 |
| chr3 | 127685739 | 128219698 |
| chr3 | 128308122 | 129230430 |
| chr3 | 129286273 | 129702355 |
| chr3 | 129797035 | 130382259 |
| chr3 | 130695501 | 130914187 |
| chr3 | 131452389 | 131671064 |
| chr3 | 133281620 | 133698575 |
| chr3 | 133885603 | 134657462 |
| chr3 | 135421319 | 136091520 |
| chr3 | 136511309 | 137156533 |
| chr3 | 137845272 | 138076429 |
| chr3 | 138420864 | 138662019 |
| chr3 | 138718962 | 139905601 |
| chr3 | 141172548 | 141878675 |
| chr3 | 142161865 | 142312456 |
| chr3 | 142607627 | 143537601 |
| chr3 | 145605239 | 145985708 |
| chr3 | 146588029 | 150948003 |
| chr3 | 151024826 | 151746548 |
| chr3 | 152442018 | 157571468 |
| chr3 | 157722825 | 159467776 |
| chr4 | 3891008   | 4504293   |
| chr4 | 4750151   | 6211741   |
| chr4 | 8733812   | 9537428   |
| chr4 | 9641777   | 10800791  |
| chr4 | 11257199  | 11374153  |
| chr4 | 12153110  | 14749124  |
| chr4 | 14858288  | 15864012  |
| chr4 | 16157385  | 19453903  |

|      |           |           |
|------|-----------|-----------|
| chr4 | 19680682  | 20719618  |
| chr4 | 20811568  | 21648929  |
| chr4 | 21836361  | 22270825  |
| chr4 | 22349171  | 24431782  |
| chr4 | 24486726  | 26710195  |
| chr4 | 29150749  | 30344277  |
| chr4 | 32884825  | 33066041  |
| chr4 | 33965270  | 34213194  |
| chr4 | 35194731  | 40052692  |
| chr4 | 40251844  | 40595921  |
| chr4 | 44431057  | 44583691  |
| chr4 | 46763449  | 46980672  |
| chr4 | 47537519  | 48033981  |
| chr4 | 48566317  | 49146182  |
| chr4 | 49623998  | 53136284  |
| chr4 | 56996350  | 57098511  |
| chr4 | 57365229  | 57633713  |
| chr4 | 58016051  | 58780499  |
| chr4 | 64068534  | 64402878  |
| chr4 | 64504334  | 66393654  |
| chr4 | 66671382  | 70007683  |
| chr4 | 70249745  | 71733804  |
| chr4 | 71901350  | 73905138  |
| chr4 | 73959558  | 76873586  |
| chr4 | 76974124  | 77852802  |
| chr4 | 78078784  | 80507863  |
| chr4 | 80795936  | 81127271  |
| chr4 | 82480719  | 82812701  |
| chr4 | 83212849  | 86191868  |
| chr4 | 86535615  | 87147173  |
| chr4 | 89227971  | 91638526  |
| chr4 | 92104215  | 93367839  |
| chr4 | 94325126  | 94595319  |
| chr4 | 95615459  | 97379346  |
| chr4 | 98410048  | 98513171  |
| chr4 | 98889673  | 99490935  |
| chr4 | 100703181 | 100807369 |
| chr4 | 101043820 | 102166374 |
| chr4 | 102252173 | 102760668 |
| chr4 | 103029472 | 104640319 |
| chr4 | 109626432 | 113001582 |
| chr4 | 113149938 | 113875864 |
| chr4 | 114013396 | 114578527 |
| chr4 | 118413914 | 118641861 |
| chr4 | 122229765 | 122457535 |
| chr4 | 124962834 | 125642119 |

|      |           |           |
|------|-----------|-----------|
| chr4 | 127083890 | 128106543 |
| chr4 | 128246005 | 128355575 |
| chr4 | 131064450 | 131359784 |
| chr4 | 136227514 | 136389349 |
| chr4 | 141719255 | 142690588 |
| chr4 | 142801929 | 143094651 |
| chr4 | 143733863 | 144416248 |
| chr4 | 147575535 | 147753253 |
| chr4 | 150430826 | 151154813 |
| chr4 | 151738067 | 153297579 |
| chr4 | 153386671 | 154212674 |
| chr5 | 4208786   | 5150677   |
| chr5 | 5780515   | 8621001   |
| chr5 | 9168653   | 10655187  |
| chr5 | 11940347  | 12572247  |
| chr5 | 12783955  | 13608799  |
| chr5 | 14285370  | 14896795  |
| chr5 | 15807274  | 16408852  |
| chr5 | 17789822  | 20294825  |
| chr5 | 20817842  | 20952981  |
| chr5 | 21315345  | 21997670  |
| chr5 | 22101041  | 22801589  |
| chr5 | 25107118  | 25409203  |
| chr5 | 26469833  | 28013788  |
| chr5 | 28117065  | 28246409  |
| chr5 | 28460823  | 28587071  |
| chr5 | 28902008  | 29379858  |
| chr5 | 37777265  | 38112350  |
| chr5 | 38646521  | 38842949  |
| chr5 | 39000890  | 40007737  |
| chr5 | 40386769  | 42175961  |
| chr5 | 42555426  | 43408246  |
| chr5 | 43662009  | 44052127  |
| chr5 | 44400393  | 44570427  |
| chr5 | 44694793  | 45250935  |
| chr5 | 45461397  | 45810386  |
| chr5 | 45936942  | 46186919  |
| chr5 | 46269406  | 47835826  |
| chr5 | 48008738  | 50390279  |
| chr5 | 50451248  | 51499233  |
| chr5 | 51656338  | 51882416  |
| chr5 | 52150139  | 52491838  |
| chr5 | 52611874  | 52888385  |
| chr5 | 54552010  | 63048579  |
| chr5 | 63200371  | 64165831  |
| chr5 | 67108538  | 67613436  |

|      |           |           |
|------|-----------|-----------|
| chr5 | 67774370  | 68668452  |
| chr5 | 68868332  | 72562533  |
| chr5 | 73864712  | 74357167  |
| chr5 | 74605521  | 74891882  |
| chr5 | 75019927  | 75191227  |
| chr5 | 75499283  | 76470896  |
| chr5 | 76981899  | 77286666  |
| chr5 | 77459502  | 77624518  |
| chr5 | 78208598  | 81052160  |
| chr5 | 82536326  | 85501663  |
| chr5 | 85608782  | 86434671  |
| chr5 | 86638795  | 87188888  |
| chr5 | 87621380  | 87946082  |
| chr5 | 88051187  | 88972224  |
| chr5 | 96745507  | 97028921  |
| chr5 | 98646531  | 99327487  |
| chr5 | 99392859  | 99506169  |
| chr5 | 100008444 | 100364693 |
| chr5 | 100473115 | 100727076 |
| chr5 | 101700897 | 102237967 |
| chr5 | 102587676 | 102898505 |
| chr5 | 103273784 | 104078395 |
| chr5 | 104507989 | 104774629 |
| chr5 | 105346044 | 105491786 |
| chr5 | 106356086 | 106799779 |
| chr5 | 107164109 | 107389976 |
| chr5 | 109390459 | 110114338 |
| chr5 | 111870418 | 112296947 |
| chr5 | 112844539 | 113484928 |
| chr5 | 113651649 | 114170743 |
| chr5 | 116518703 | 116823453 |
| chr5 | 116936510 | 117455077 |
| chr5 | 117870643 | 118228238 |
| chr5 | 119321759 | 120491191 |
| chr5 | 126025841 | 126998763 |
| chr5 | 127060165 | 129024104 |
| chr5 | 129129304 | 129487473 |
| chr5 | 129551972 | 129911103 |
| chr5 | 130793088 | 131651813 |
| chr5 | 131726224 | 134547901 |
| chr5 | 137177563 | 137284900 |
| chr5 | 138659548 | 139014871 |
| chr5 | 141322089 | 142823331 |
| chr5 | 145178629 | 145440713 |
| chr5 | 147134030 | 147466180 |
| chr5 | 148704083 | 149150384 |

|      |           |           |
|------|-----------|-----------|
| chr5 | 149529308 | 149717884 |
| chr5 | 149858458 | 151382902 |
| chr5 | 152148994 | 152534864 |
| chr6 | 3490119   | 5171263   |
| chr6 | 5575266   | 7763377   |
| chr6 | 7876052   | 11762597  |
| chr6 | 12035579  | 12246994  |
| chr6 | 14181914  | 15626831  |
| chr6 | 15815584  | 16941730  |
| chr6 | 18773514  | 21766392  |
| chr6 | 21913158  | 22275420  |
| chr6 | 22585047  | 24071403  |
| chr6 | 24193813  | 24541064  |
| chr6 | 24657939  | 28360858  |
| chr6 | 31914583  | 32156490  |
| chr6 | 32340695  | 32650197  |
| chr6 | 35647615  | 37257393  |
| chr6 | 39733250  | 40317079  |
| chr6 | 40425651  | 40914746  |
| chr6 | 41016872  | 41431451  |
| chr6 | 41543618  | 42166448  |
| chr6 | 42544271  | 43178438  |
| chr6 | 43679215  | 47074963  |
| chr6 | 51145534  | 51276930  |
| chr6 | 55393256  | 56625846  |
| chr6 | 56891203  | 57397098  |
| chr6 | 57513251  | 57617354  |
| chr6 | 57822000  | 58475859  |
| chr6 | 59100383  | 59763622  |
| chr6 | 59893632  | 60658323  |
| chr6 | 60831717  | 64983557  |
| chr6 | 65083304  | 66791919  |
| chr6 | 67257070  | 67557196  |
| chr6 | 67711346  | 68919320  |
| chr6 | 69641595  | 70267526  |
| chr6 | 72996495  | 73100732  |
| chr6 | 73265605  | 78598235  |
| chr6 | 78858390  | 81745821  |
| chr6 | 81955146  | 82598295  |
| chr6 | 92267675  | 92576436  |
| chr6 | 95147101  | 95530196  |
| chr6 | 95703036  | 97064794  |
| chr6 | 97493975  | 97696746  |
| chr6 | 97877799  | 98517592  |
| chr6 | 99508791  | 99751487  |
| chr6 | 100852304 | 106610534 |

|      |           |           |
|------|-----------|-----------|
| chr6 | 107007914 | 107991308 |
| chr6 | 108815762 | 112125883 |
| chr6 | 112354027 | 112581470 |
| chr6 | 113735944 | 114231899 |
| chr6 | 116372777 | 117745500 |
| chr6 | 118430008 | 118876185 |
| chr6 | 119008416 | 119247206 |
| chr6 | 121223246 | 122088446 |
| chr6 | 122195422 | 122711002 |
| chr6 | 122836603 | 123292940 |
| chr6 | 123612496 | 124348389 |
| chr6 | 125581550 | 125938001 |
| chr6 | 126007238 | 126999855 |
| chr6 | 127110279 | 127871711 |
| chr6 | 128535946 | 128712921 |
| chr6 | 131384067 | 132050725 |
| chr6 | 132283967 | 133125903 |
| chr6 | 133490603 | 133859549 |
| chr6 | 135391952 | 136436796 |
| chr6 | 136511782 | 139524195 |
| chr6 | 139794962 | 140313385 |
| chr6 | 140638856 | 142080946 |
| chr6 | 142332276 | 143319809 |
| chr6 | 143633500 | 144580812 |
| chr6 | 144713512 | 145154787 |
| chr6 | 145317325 | 145607331 |
| chr6 | 147057505 | 147651838 |
| chr6 | 147736671 | 148721882 |
| chr6 | 149362182 | 149516399 |
| chr7 | 4167641   | 4370694   |
| chr7 | 5097797   | 5342396   |
| chr7 | 6155789   | 7154154   |
| chr7 | 10709960  | 11351052  |
| chr7 | 12223065  | 13436313  |
| chr7 | 13658434  | 14273834  |
| chr7 | 14656892  | 15240900  |
| chr7 | 18221416  | 18807986  |
| chr7 | 24083537  | 24428083  |
| chr7 | 24553630  | 25033190  |
| chr7 | 26722995  | 27604824  |
| chr7 | 31564031  | 31704181  |
| chr7 | 34389305  | 34858569  |
| chr7 | 36642644  | 38689924  |
| chr7 | 46852234  | 47915854  |
| chr7 | 48015304  | 48377413  |
| chr7 | 48571229  | 49865883  |

|      |           |           |
|------|-----------|-----------|
| chr7 | 54437157  | 55033841  |
| chr7 | 55141873  | 55977659  |
| chr7 | 57146298  | 59088019  |
| chr7 | 59216201  | 61094410  |
| chr7 | 61183958  | 63046527  |
| chr7 | 63476072  | 65608469  |
| chr7 | 66308108  | 66481411  |
| chr7 | 67067106  | 67734118  |
| chr7 | 67958623  | 68569576  |
| chr7 | 69366738  | 70894407  |
| chr7 | 71549106  | 72399205  |
| chr7 | 73983827  | 74202539  |
| chr7 | 75420568  | 77136901  |
| chr7 | 77504151  | 79637648  |
| chr7 | 80300966  | 80519500  |
| chr7 | 82311863  | 82456465  |
| chr7 | 83088110  | 84141772  |
| chr7 | 84301633  | 85896713  |
| chr7 | 88768374  | 88896457  |
| chr7 | 88975197  | 89164903  |
| chr7 | 89248732  | 89807063  |
| chr7 | 89929553  | 90949100  |
| chr7 | 91538459  | 91715482  |
| chr7 | 91886549  | 94298831  |
| chr7 | 94467061  | 95353364  |
| chr7 | 95688212  | 96203475  |
| chr7 | 97843971  | 98785235  |
| chr7 | 100096256 | 100504961 |
| chr7 | 101226359 | 102346272 |
| chr7 | 102464946 | 104064738 |
| chr7 | 109684953 | 109971164 |
| chr7 | 110077093 | 111371330 |
| chr7 | 111430424 | 112586330 |
| chr7 | 113385088 | 115143705 |
| chr7 | 115485384 | 116083138 |
| chr7 | 116137092 | 116621717 |
| chr7 | 118443338 | 119102958 |
| chr7 | 120941270 | 121133024 |
| chr7 | 121446275 | 122707534 |
| chr7 | 122821974 | 123222821 |
| chr7 | 123718505 | 124863492 |
| chr7 | 126184558 | 126977907 |
| chr7 | 127084190 | 127266997 |
| chr7 | 127344169 | 127771768 |
| chr7 | 128238181 | 129077531 |
| chr7 | 129320984 | 130049234 |



|      |           |           |
|------|-----------|-----------|
| chr7 | 130604458 | 132589114 |
| chr7 | 135939223 | 136771317 |
| chr7 | 138197877 | 138489016 |
| chr7 | 138587322 | 139440496 |
| chr7 | 139643863 | 139759506 |
| chr7 | 142405461 | 142656365 |
| chr7 | 142944971 | 144426641 |
| chr7 | 144660621 | 146020669 |
| chr7 | 146123637 | 146387685 |
| chr7 | 146782598 | 147137007 |
| chr7 | 147339999 | 148012300 |
| chr7 | 149662118 | 150179333 |
| chr7 | 150313127 | 150427995 |
| chr7 | 150518130 | 150649713 |
| chr8 | 3697743   | 4177557   |
| chr8 | 5341859   | 6003220   |
| chr8 | 8735509   | 8990532   |
| chr8 | 9213134   | 9945217   |
| chr8 | 14120902  | 14232037  |
| chr8 | 15123215  | 17500644  |
| chr8 | 18908630  | 19654603  |
| chr8 | 22924437  | 23075722  |
| chr8 | 23362572  | 23481158  |
| chr8 | 24440113  | 24645440  |
| chr8 | 24708004  | 25459259  |
| chr8 | 25729469  | 25945613  |
| chr8 | 28439059  | 32156198  |
| chr8 | 33916234  | 34170012  |
| chr8 | 36589567  | 36914434  |
| chr8 | 37135830  | 40033725  |
| chr8 | 40485839  | 41370684  |
| chr8 | 41868968  | 42087564  |
| chr8 | 42559088  | 43076839  |
| chr8 | 43276976  | 45712791  |
| chr8 | 48061601  | 48568957  |
| chr8 | 49120245  | 55465234  |
| chr8 | 55747766  | 56192094  |
| chr8 | 58084772  | 58533540  |
| chr8 | 59063974  | 59904967  |
| chr8 | 60028524  | 63340116  |
| chr8 | 64180680  | 66119095  |
| chr8 | 67518373  | 70201813  |
| chr8 | 70890098  | 71235001  |
| chr8 | 75969255  | 77515078  |
| chr8 | 77855265  | 79407012  |
| chr8 | 79669689  | 80022984  |

|      |           |           |
|------|-----------|-----------|
| chr8 | 80126886  | 81024739  |
| chr8 | 82294139  | 83476686  |
| chr8 | 83570085  | 84215921  |
| chr8 | 85503754  | 86067834  |
| chr8 | 89629572  | 90618570  |
| chr8 | 90938453  | 91170647  |
| chr8 | 92346781  | 93282646  |
| chr8 | 93692861  | 93817253  |
| chr8 | 94944893  | 96374109  |
| chr8 | 98046427  | 98159235  |
| chr8 | 98477364  | 106714652 |
| chr8 | 110143004 | 112082195 |
| chr8 | 112567897 | 113129238 |
| chr8 | 114585400 | 116672220 |
| chr8 | 116811172 | 117068462 |
| chr8 | 117278741 | 117995529 |
| chr8 | 118644212 | 119427337 |
| chr8 | 120006224 | 120171411 |
| chr8 | 120311987 | 120766014 |
| chr8 | 120848947 | 121884918 |
| chr8 | 123211037 | 123451927 |
| chr8 | 123603984 | 123981056 |
| chr8 | 126889054 | 126990767 |
| chr8 | 127690823 | 128937107 |
| chr8 | 131281465 | 131708489 |
| chr9 | 3326524   | 5955102   |
| chr9 | 6757730   | 6951801   |
| chr9 | 7301142   | 7520782   |
| chr9 | 8063003   | 9019779   |
| chr9 | 9380674   | 13136146  |
| chr9 | 14610902  | 14836902  |
| chr9 | 15161004  | 18388772  |
| chr9 | 18568813  | 19498086  |
| chr9 | 19627588  | 20219338  |
| chr9 | 22529752  | 23346201  |
| chr9 | 23804910  | 24895884  |
| chr9 | 25425641  | 26773371  |
| chr9 | 26859406  | 28733577  |
| chr9 | 28874640  | 29008026  |
| chr9 | 29248158  | 30141065  |
| chr9 | 31770789  | 32407152  |
| chr9 | 32659578  | 33282045  |
| chr9 | 34306208  | 34663932  |
| chr9 | 35383562  | 36496961  |
| chr9 | 36594019  | 36978558  |
| chr9 | 37739668  | 40016945  |

|      |           |           |
|------|-----------|-----------|
| chr9 | 40169501  | 40553414  |
| chr9 | 40650324  | 40804018  |
| chr9 | 42387563  | 42679264  |
| chr9 | 47753514  | 48263500  |
| chr9 | 48863121  | 49219927  |
| chr9 | 51175488  | 51706032  |
| chr9 | 52137324  | 52979058  |
| chr9 | 53526403  | 54295522  |
| chr9 | 67168296  | 67305516  |
| chr9 | 67564116  | 69131267  |
| chr9 | 69412877  | 69688286  |
| chr9 | 75451572  | 75783205  |
| chr9 | 75938845  | 76268601  |
| chr9 | 76447529  | 77267228  |
| chr9 | 78498633  | 78789113  |
| chr9 | 79676314  | 79873893  |
| chr9 | 81846482  | 82733495  |
| chr9 | 82884356  | 83387505  |
| chr9 | 83520296  | 84140074  |
| chr9 | 84427046  | 84884553  |
| chr9 | 85224558  | 85598804  |
| chr9 | 85674548  | 86329362  |
| chr9 | 86692428  | 88141586  |
| chr9 | 89111009  | 89706746  |
| chr9 | 90212774  | 92089703  |
| chr9 | 92376334  | 93870467  |
| chr9 | 94412974  | 95351005  |
| chr9 | 97096694  | 98041471  |
| chr9 | 98482741  | 98891121  |
| chr9 | 99664285  | 100306414 |
| chr9 | 101192989 | 102486860 |
| chr9 | 103303525 | 103946973 |
| chr9 | 104175681 | 106042743 |
| chr9 | 106409231 | 106533017 |
| chr9 | 106805472 | 107148385 |
| chr9 | 109279734 | 109728130 |
| chr9 | 111198431 | 111583389 |
| chr9 | 112016645 | 113544615 |
| chr9 | 113901009 | 114034118 |
| chr9 | 114301358 | 114416076 |
| chr9 | 114901103 | 115085915 |
| chr9 | 115270864 | 116001090 |
| chr9 | 116295095 | 117816121 |
| chr9 | 117870627 | 118383466 |
| chr9 | 118484899 | 118809344 |
| chr9 | 119373254 | 119785998 |

|      |           |           |
|------|-----------|-----------|
| chr9 | 120032632 | 120483828 |
| chr9 | 121383906 | 121546329 |
| chr9 | 122336953 | 122727675 |
| chr9 | 123834220 | 124061522 |
| chrX | 5185664   | 5921069   |
| chrX | 6121117   | 6703197   |
| chrX | 8417284   | 8735382   |
| chrX | 9633858   | 9763960   |
| chrX | 13488098  | 16060192  |
| chrX | 19598736  | 19892850  |
| chrX | 20585396  | 22912488  |
| chrX | 23436067  | 23665858  |
| chrX | 33248984  | 33490815  |
| chrX | 36043751  | 39141252  |
| chrX | 39891493  | 40717183  |
| chrX | 40851410  | 45256345  |
| chrX | 46038516  | 46278817  |
| chrX | 46754748  | 46925992  |
| chrX | 47101946  | 47310806  |
| chrX | 47421985  | 47890500  |
| chrX | 48018986  | 49166051  |
| chrX | 49268346  | 49501963  |
| chrX | 49657300  | 50228556  |
| chrX | 50970451  | 51301941  |
| chrX | 53404652  | 53819012  |
| chrX | 54058935  | 54616193  |
| chrX | 54691175  | 54860322  |
| chrX | 54910458  | 55152159  |
| chrX | 55328660  | 56289182  |
| chrX | 56394870  | 57586612  |
| chrX | 57671009  | 59869128  |
| chrX | 59980223  | 62973187  |
| chrX | 63495661  | 63926345  |
| chrX | 64583628  | 64987428  |
| chrX | 66550097  | 67388056  |
| chrX | 72428364  | 72578856  |
| chrX | 73384581  | 74293642  |
| chrX | 75047612  | 75733610  |
| chrX | 75840853  | 82277500  |
| chrX | 83172263  | 83828990  |
| chrX | 83921947  | 88648428  |
| chrX | 89224024  | 90290826  |
| chrX | 90574720  | 90679168  |
| chrX | 91657347  | 92071765  |
| chrX | 92183582  | 93131194  |
| chrX | 93392920  | 94481823  |

|      |           |           |
|------|-----------|-----------|
| chrX | 94624998  | 95787033  |
| chrX | 98012708  | 98212737  |
| chrX | 101235458 | 101397140 |
| chrX | 102330377 | 102960936 |
| chrX | 103452338 | 103744173 |
| chrX | 103903983 | 105761228 |
| chrX | 106115342 | 106232613 |
| chrX | 106410576 | 109403380 |
| chrX | 109463762 | 110132019 |
| chrX | 110354248 | 115582135 |
| chrX | 115695237 | 116310084 |
| chrX | 116364862 | 120107134 |
| chrX | 122949551 | 125881670 |
| chrX | 127221249 | 130607590 |
| chrX | 130898674 | 131022713 |
| chrX | 131462231 | 131611382 |
| chrX | 132100678 | 132719912 |
| chrX | 132842630 | 133431596 |
| chrX | 133684396 | 135093842 |
| chrX | 136634216 | 136758394 |
| chrX | 139509844 | 139879861 |
| chrX | 140220914 | 141848981 |
| chrX | 141991231 | 143665758 |
| chrX | 143828189 | 144167250 |
| chrX | 149338676 | 149610478 |
| chrX | 150144830 | 150417282 |
| chrX | 150604054 | 151358573 |
| chrX | 151806425 | 153932120 |
| chrX | 154064586 | 155726016 |
| chrX | 155823306 | 155932109 |
| chrX | 156394417 | 156516357 |
| chrX | 157486034 | 159148373 |
| chrX | 159385591 | 160354442 |
| chrX | 160493033 | 161362720 |
| chrX | 162061338 | 162569265 |
| chrX | 163851376 | 165359890 |
| chrY | 249421    | 776520    |

---
